# Supplementary material for: Evaluation of the uncertainty in an EBT3 film dosimetry system utilizing net optical density
Source: PubMed Central journal article supplement (PMC5874103; doi:10.1120/jacmp.v17i5.6262), 2016-09-08
Supplement: ACM2-17-466-s002.pdf [file ACM2-17-466-s002.pdf]

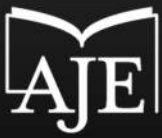

# EDITORIAL CERTIFICATE

This document certifies that the manuscript listed below was edited for proper English language, grammar, punctuation, spelling, and overall style by one or more of the highly qualified native English speaking editors at American Journal Experts.

## Manuscript title:

Evaluation of the intrinsic characteristics of a radiochromic EBT3 film dosimetry system and its contribution to uncertainty in dose

## Authors:

León-Marroquin Elsa Y., Herrera-González J. Alfredo, García-Garduño Olivia A., Miguel A. Camacho-López, J. Eduardo Villarreal-Barajas

## Date Issued:

November 12, 2015

## Certificate Verification Key:

9BE3-D780-E954-53BD-6EB5

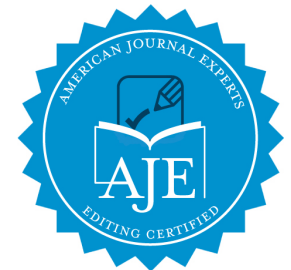

This certificate may be verified at [www.aje.com/certificate](http://www.aje.com/certificate). This document certifies that the manuscript listed above was edited for proper English language, grammar, punctuation, spelling, and overall style by one or more of the highly qualified native English speaking editors at American Journal Experts. Neither the research content nor the authors' intentions were altered in any way during the editing process. Documents receiving this certification should be English-ready for publication; however, the author has the ability to accept or reject our suggestions and changes. To verify the final AJE edited version, please visit our verification page. If you have any questions or concerns about this edited document, please contact American Journal Experts at [support@aje.com](mailto:support@aje.com).
